# Supplementary material for: The microRNAs miR-204 and miR-211 maintain joint homeostasis and protect against osteoarthritis progression
Source: PubMed Central journal article supplement (PMC6599052; doi:10.1038/s41467-019-10753-5), 2019-06-28

Full unedited gel for Figure 3b

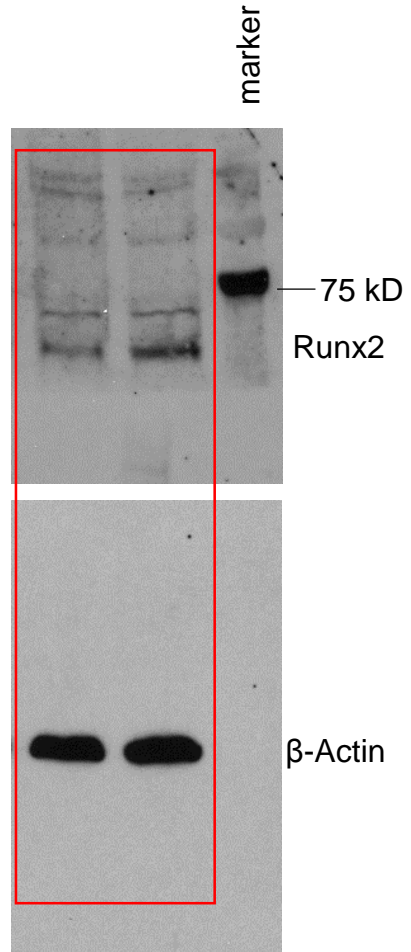

Full unedited gel for Figure 5

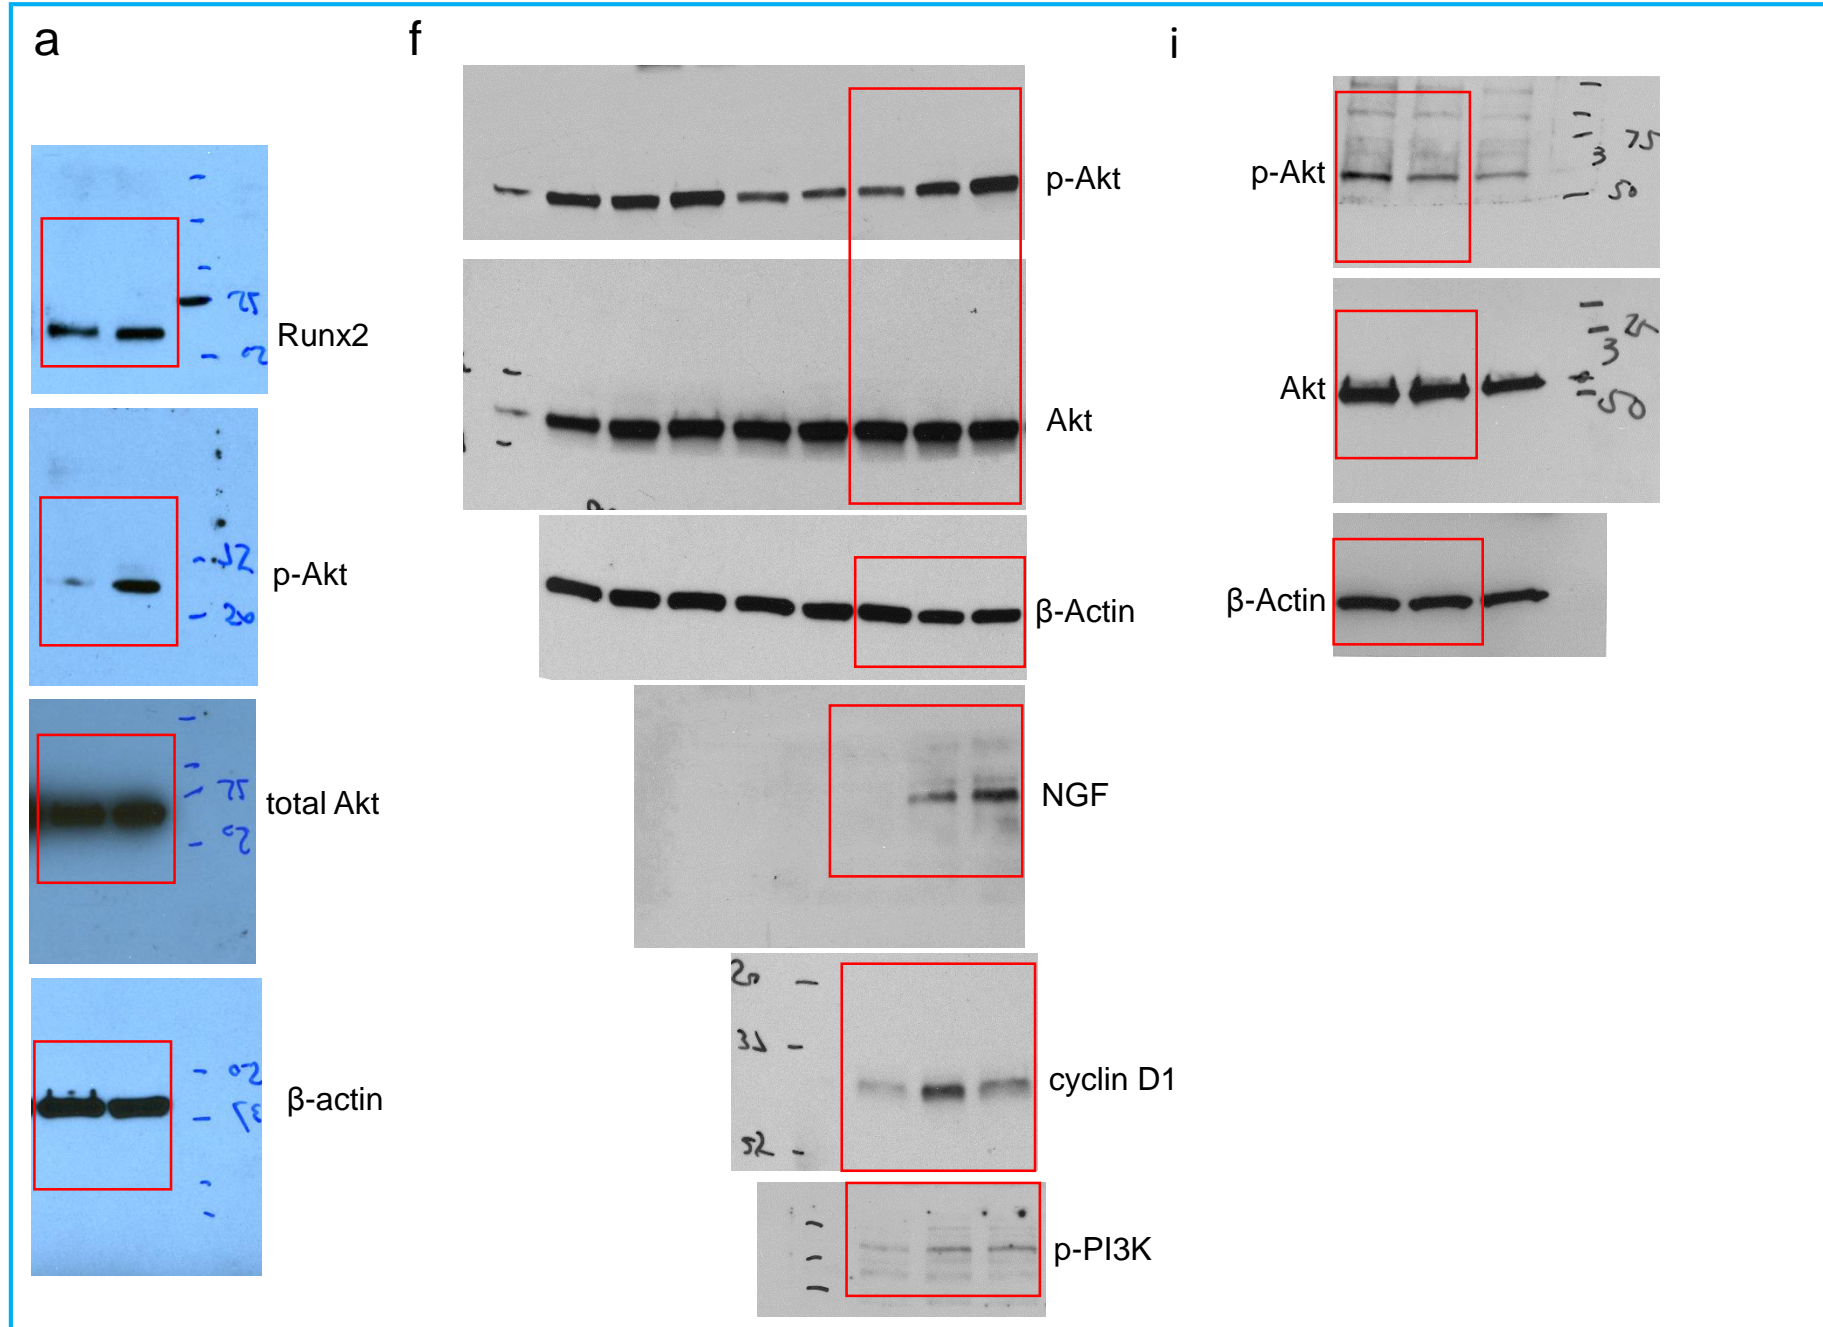

Supplement: 41467_2019_10753_MOESM2_ESM.pdf [file 41467_2019_10753_MOESM2_ESM.pdf]
